# Supplementary material for: X-ray photoelectron spectroscopy of morpholinium ionic liquids: impact of a long alkyl side substituent on the cation–anion interactions
Source: Royal Society of Chemistry journal article supplement (doi:10.1039/d2cp03674f), 2022-01-01
Supplement: d2cp03674f1.pdf [file d2cp03674f1.pdf]

## Electronic Supplementary Information

### X-ray photoelectron spectroscopy of morpholinium ionic liquids: Impact of the long alkyl side substituent on the cation-anion interactions

Shuang Men<sup>1,2\*</sup>, Yusheng Sun<sup>1</sup>, Peter Licence<sup>3</sup> and Jun Qu<sup>4\*</sup>

1 School of Material Science and Engineering  
Shenyang Ligong University  
Shenyang, P. R. China  
110159

2 Chemical Sciences Division  
Oak Ridge National Laboratory  
Oak Ridge, United States  
37830

3 School of Chemistry  
The University of Nottingham  
Nottingham, United Kingdom  
NG7 2RD

4 Material Science and Technology Division  
Oak Ridge National Laboratory  
Oak Ridge, United States  
37830

To whom correspondence should be addressed

[menshuang@hotmail.com](mailto:menshuang@hotmail.com)

[qujn@ornl.gov](mailto:qujn@ornl.gov)

## Synthesis of ionic liquids

### **[C<sub>2</sub>C<sub>1</sub>Mor]Br**

Into a three-neck round-bottomed flask, 1-methylmorpholine was placed. The system was fitted with an air condenser topped with a blue silica tube aiming to avoid introducing of moisture. 1.2 Equivalent of 1-bromoethane was added into the reaction system by dropping wise with stirring at room temperature. The reaction was allowed to proceed for 48-72 hours. The mixture was then washed with ethyl acetate three times to remove unreacted 1-methylmorpholine. The desired product, [C<sub>2</sub>C<sub>1</sub>Mor]Br, was firstly dried using a rotary evaporator and then under high vacuum at 60 °C for 12 h to yield a white solid.<sup>1,2</sup>

<sup>1</sup>H NMR  $\delta_{\text{H}}$  (500Hz, DMSO-*d*<sub>6</sub>) 1.25 (t, *J* = 7.3 Hz, 3H), 3.11 (s, 3H), 3.40 (m, 4H), 3.53 (m, 2H), 3.91 (br.s, 4H).

### **[C<sub>4</sub>C<sub>1</sub>Mor]Br**

A similar procedure to that outlined for [C<sub>2</sub>C<sub>1</sub>Mor]Br except that the reaction temperature was set to 70 °C, was used to yield [C<sub>4</sub>C<sub>1</sub>Mor]Br as a white solid.

<sup>1</sup>H NMR  $\delta_{\text{H}}$  (500Hz, DMSO-*d*<sub>6</sub>) 0.94 (t, *J* = 7.3 Hz, 3H), 1.32 (m, 2H), 1.67 (m, 2H), 3.12 (s, 3H), 3.40 (m, 6H), 3.91 (m, 4H).

### **[C<sub>8</sub>C<sub>1</sub>Mor]Br**

A similar procedure to that outlined for [C<sub>4</sub>C<sub>1</sub>Mor]Br was used to yield [C<sub>8</sub>C<sub>1</sub>Mor]Br as a pale yellow solid.

<sup>1</sup>H NMR  $\delta_{\text{H}}$  (500Hz, DMSO-*d*<sub>6</sub>) 0.87 (t, *J* = 7.3 Hz, 3H), 1.29 (m, 10H), 1.69 (m, 2H), 3.15 (s, 3H), 3.45 (m, 6H), 3.91 (m, 4H).

### **[C<sub>12</sub>C<sub>1</sub>Mor]Br**

A similar procedure to that outlined for [C<sub>4</sub>C<sub>1</sub>Mor]Br was used to yield [C<sub>12</sub>C<sub>1</sub>Mor]Br as a white solid.

<sup>1</sup>H NMR  $\delta_{\text{H}}$  (500Hz, DMSO-*d*<sub>6</sub>) 0.87 (t, *J* = 7.3 Hz, 3H), 1.28 (m, 18H), 1.68 (m, 2H), 3.15 (s, 3H), 3.44 (m, 6H), 3.91 (m, 4H).

### **[C<sub>2</sub>C<sub>1</sub>Mor][Tf<sub>2</sub>N]**

[C<sub>2</sub>C<sub>1</sub>Mor]Br was dissolved in deionised water and then transferred to a three necked round-bottomed flask fitted with a water condenser topped with a blue silica tube. 1.2 Equivalent of lithium bis(trifluoromethanesulfonyl)imide was dissolved in deionised water firstly and then added drop wise into the system. The reaction mixture was then stirred at room temperature for 12 h. After separated completely, the lower phase was collected and washed with deionised water by at least five times. To aid fully separation, dichloromethane was added into the system. The desired [C<sub>2</sub>C<sub>1</sub>Mor][Tf<sub>2</sub>N] was then dried firstly under rotary evaporator and then under high vacuum at 60 °C for 12 h to yield a colourless liquid.<sup>1,3</sup>

<sup>1</sup>H NMR  $\delta_{\text{H}}$  (500Hz, CDCl<sub>3</sub>) 1.35 (t, *J* = 7.3 Hz, 3H), 3.06 (s, 3H), 3.34 (m, 4H), 3.45 (m, 2H), 3.92 (m, 4H).

### **[C<sub>4</sub>C<sub>1</sub>Mor][Tf<sub>2</sub>N]**

A similar procedure to that outlined for [C<sub>2</sub>C<sub>1</sub>Mor][Tf<sub>2</sub>N] was used to yield [C<sub>4</sub>C<sub>1</sub>Mor][Tf<sub>2</sub>N] as a colourless liquid.

<sup>1</sup>H NMR δ<sub>H</sub> (500Hz, DMSO-*d*<sub>6</sub>) 0.93 (t, *J* = 7.3 Hz, 3H), 1.30 (m, 2H), 1.64 (m, 2H), 3.09 (s, 3H), 3.38 (m, 6H), 3.89 (br.s, 4H).

### **[C<sub>8</sub>C<sub>1</sub>Mor][Tf<sub>2</sub>N]**

A similar procedure to that outlined for [C<sub>2</sub>C<sub>1</sub>Mor][Tf<sub>2</sub>N] was used to yield [C<sub>8</sub>C<sub>1</sub>Mor][Tf<sub>2</sub>N] as a colourless liquid.

<sup>1</sup>H NMR δ<sub>H</sub> (500Hz, CDCl<sub>3</sub>) 0.87 (t, *J* = 7.3 Hz, 3H), 1.31 (m, 10H), 1.72 (m, 2H), 3.15 (s, 3H), 3.34 (m, 2H), 3.41 (m, 4H), 3.96 (m, 4H).

### **[C<sub>12</sub>C<sub>1</sub>Mor][Tf<sub>2</sub>N]**

A similar procedure to that outlined for [C<sub>2</sub>C<sub>1</sub>Mor][Tf<sub>2</sub>N] was used to yield [C<sub>12</sub>C<sub>1</sub>Mor][Tf<sub>2</sub>N] as a colourless liquid.

<sup>1</sup>H NMR δ<sub>H</sub> (500Hz, DMSO-*d*<sub>6</sub>) 0.86 (t, *J* = 7.3 Hz, 3H), 1.25 (m, 18H), 1.68 (m, 2H), 3.11 (s, 3H), 3.39 (m, 6H), 3.91 (m, 4H).

### **[C<sub>8</sub>C<sub>1</sub>Mor][PF<sub>6</sub>]**

[C<sub>8</sub>C<sub>1</sub>Mor]Br was dissolved in deionised water firstly and then placed into a three-neck round bottomed flask. Potassium hexafluorophosphate (1.2 molar equivalents) was dissolved in deionised water and then added into the reaction system by dropping wise. The reaction was conducted under iced bath for 24 h with stirring. Dichloromethane was added into the mixture to aid the collection of the lower phase. After separation, the lower phase was washed with deionised water by at least five times (the solubility of potassium hexafluorophosphate in water is low). The desired [C<sub>8</sub>C<sub>1</sub>Mor][PF<sub>6</sub>] was firstly dried under rotary evaporator and then under high vacuum at 60 °C for 12 h to yield a yellow solid.<sup>1,4</sup>

<sup>1</sup>H NMR δ<sub>H</sub> (600Hz, DMSO-*d*<sub>6</sub>) 0.87 (t, *J* = 7.3 Hz, 3H), 1.30 (m, 10H), 1.67 (m, 2H), 3.10 (s, 3H), 3.38 (m, 6H), 3.90 (m, 4H).

## XP spectra

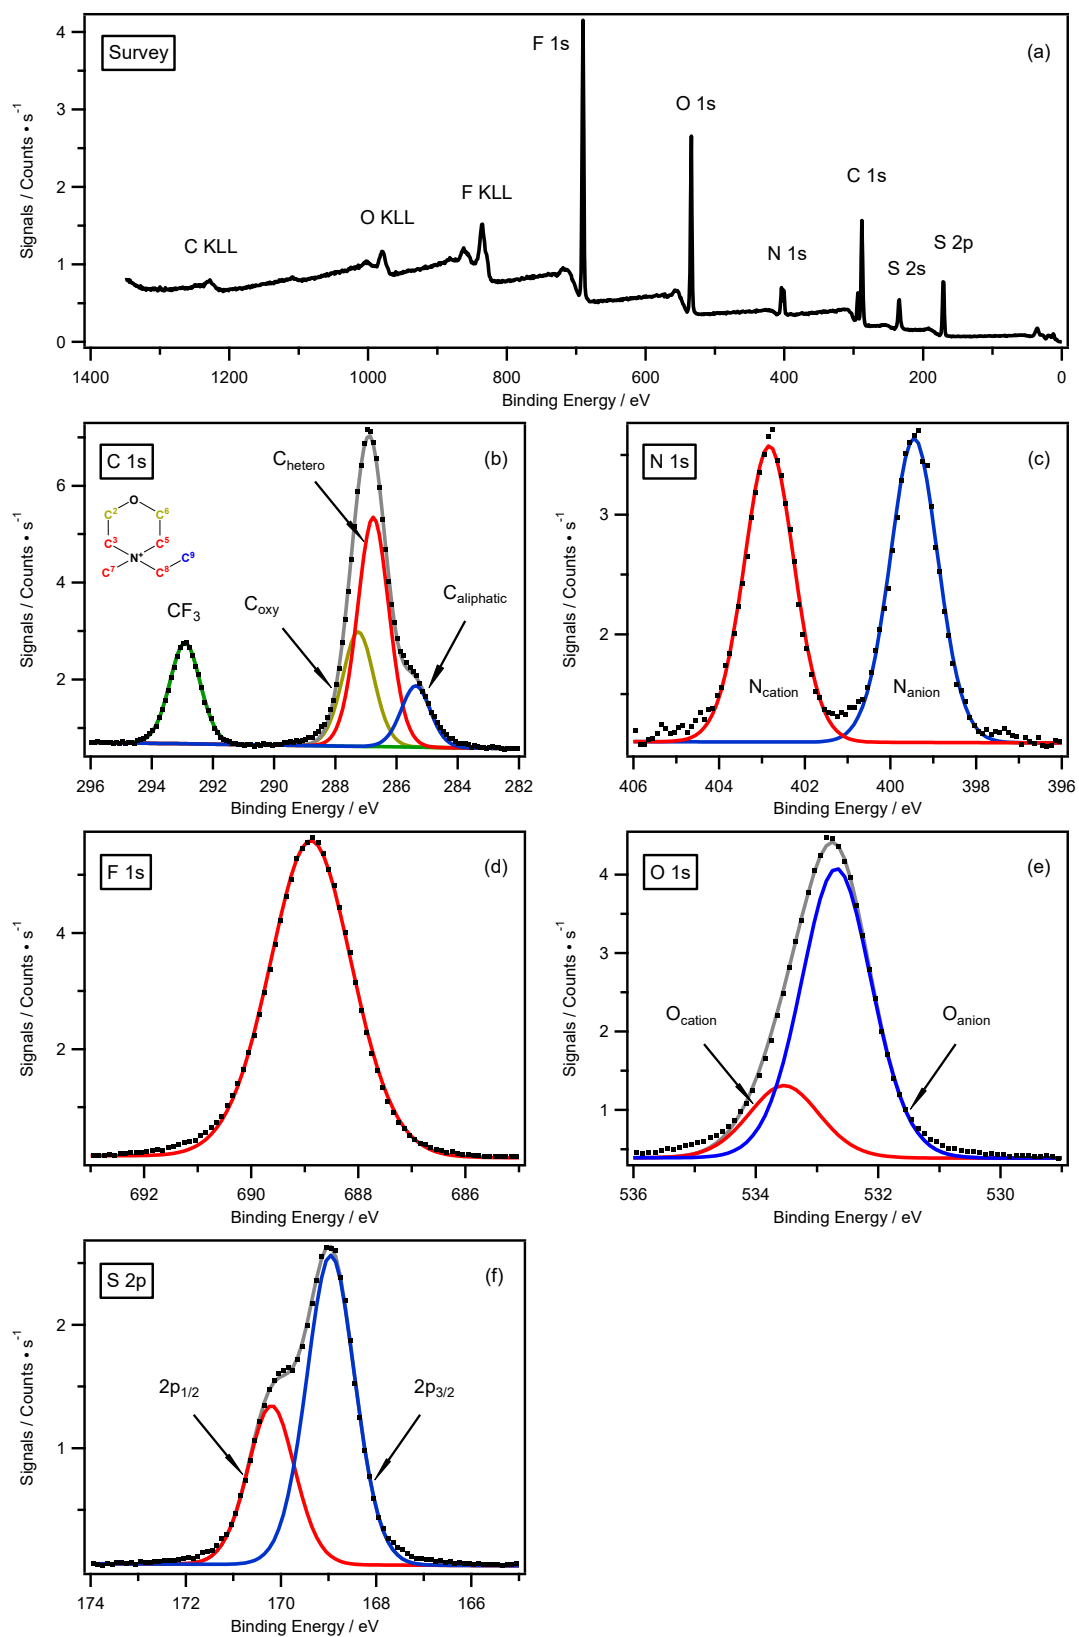

**Figure S1** XPS spectra of all elements for  $[C_2C_1Mor][Tf_2N]$ : (a) Survey, (b) C 1s, (c) N 1s, (d) F 1s, (e) O 1s and (f) S 2p.

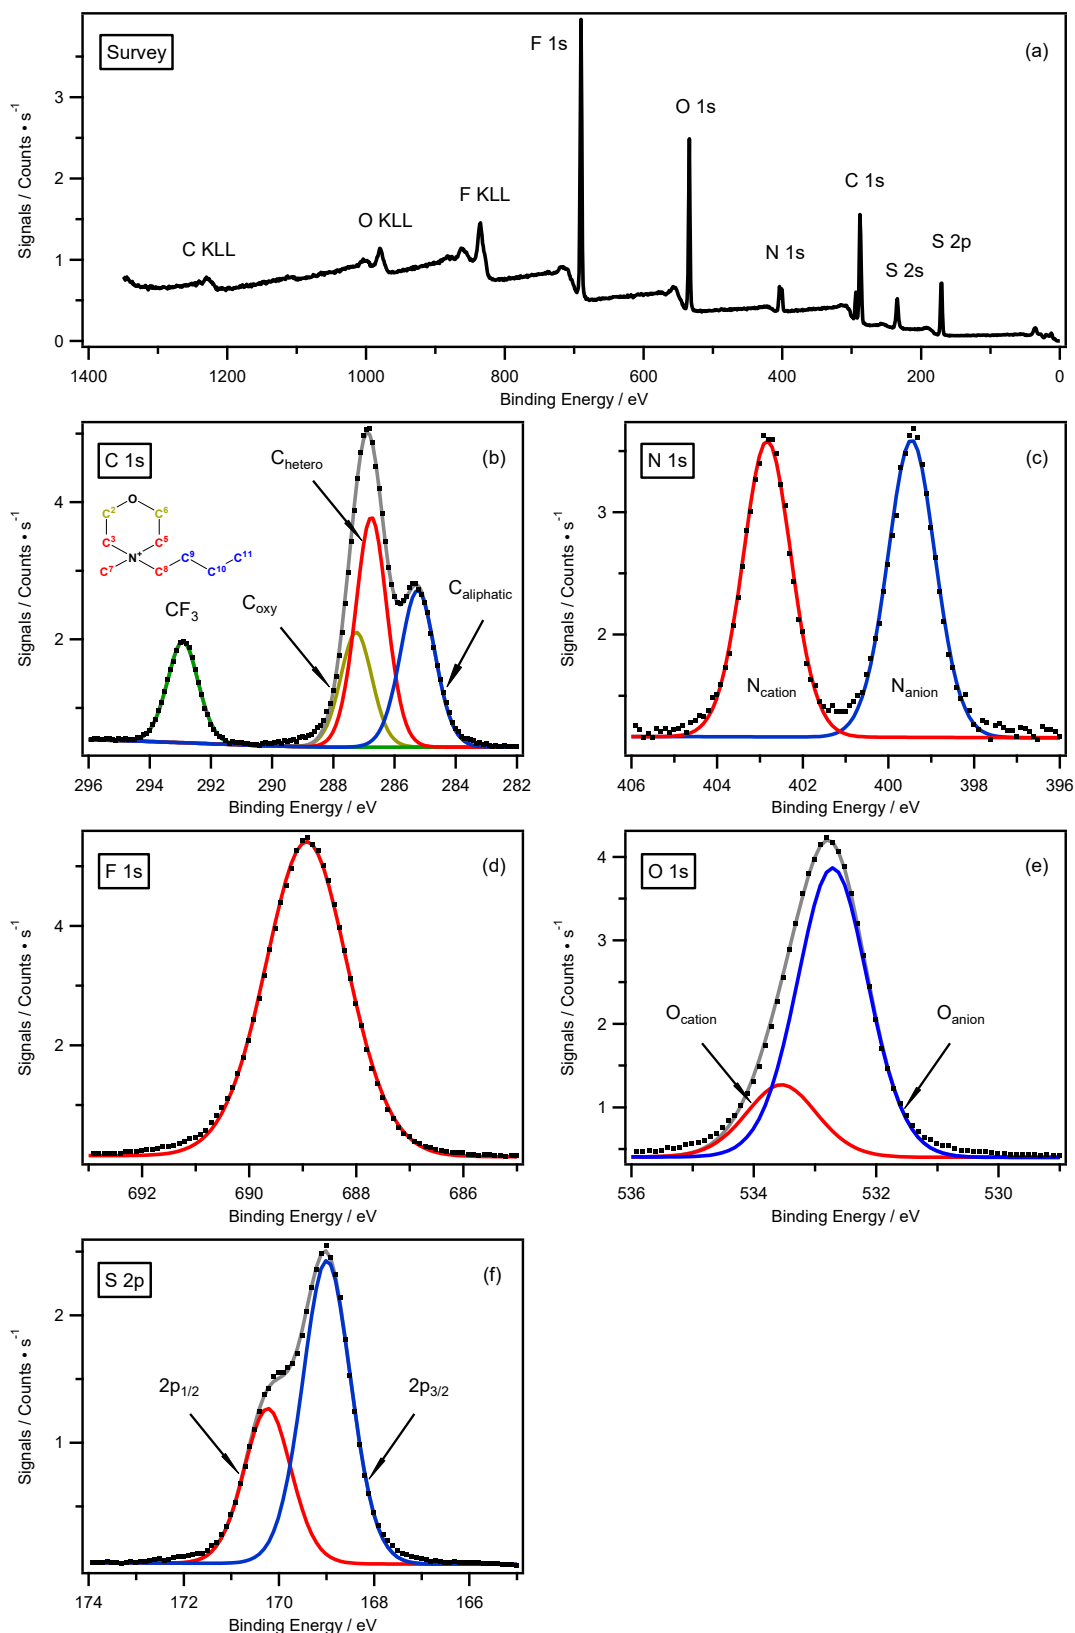

**Figure S2** XPS spectra of all elements for  $[C_4C_1Mor][Tf_2N]$ : (a) Survey, (b) C 1s, (c) N 1s, (d) F 1s, (e) O 1s and (f) S 2p.

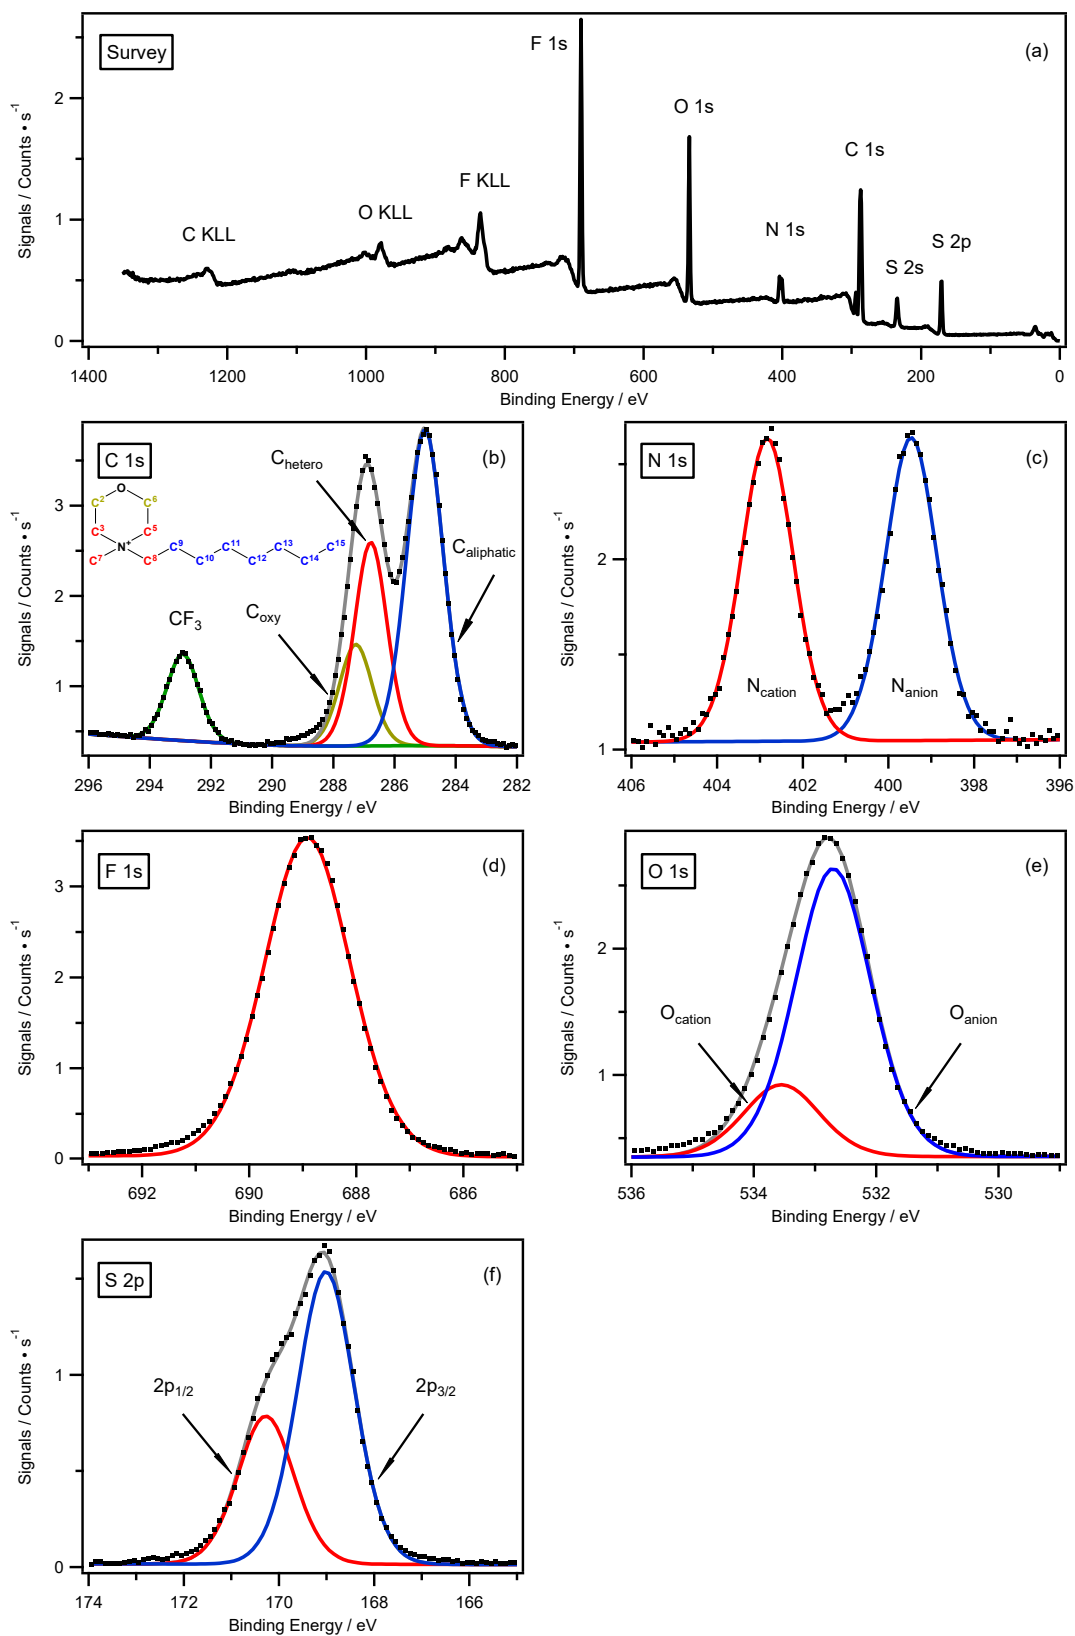

**Figure S3** XPS spectra of all elements for  $[C_8C_1Mor][Tf_2N]$ : (a) Survey, (b) C 1s, (c) N 1s, (d) F 1s, (e) O 1s and (f) S 2p.

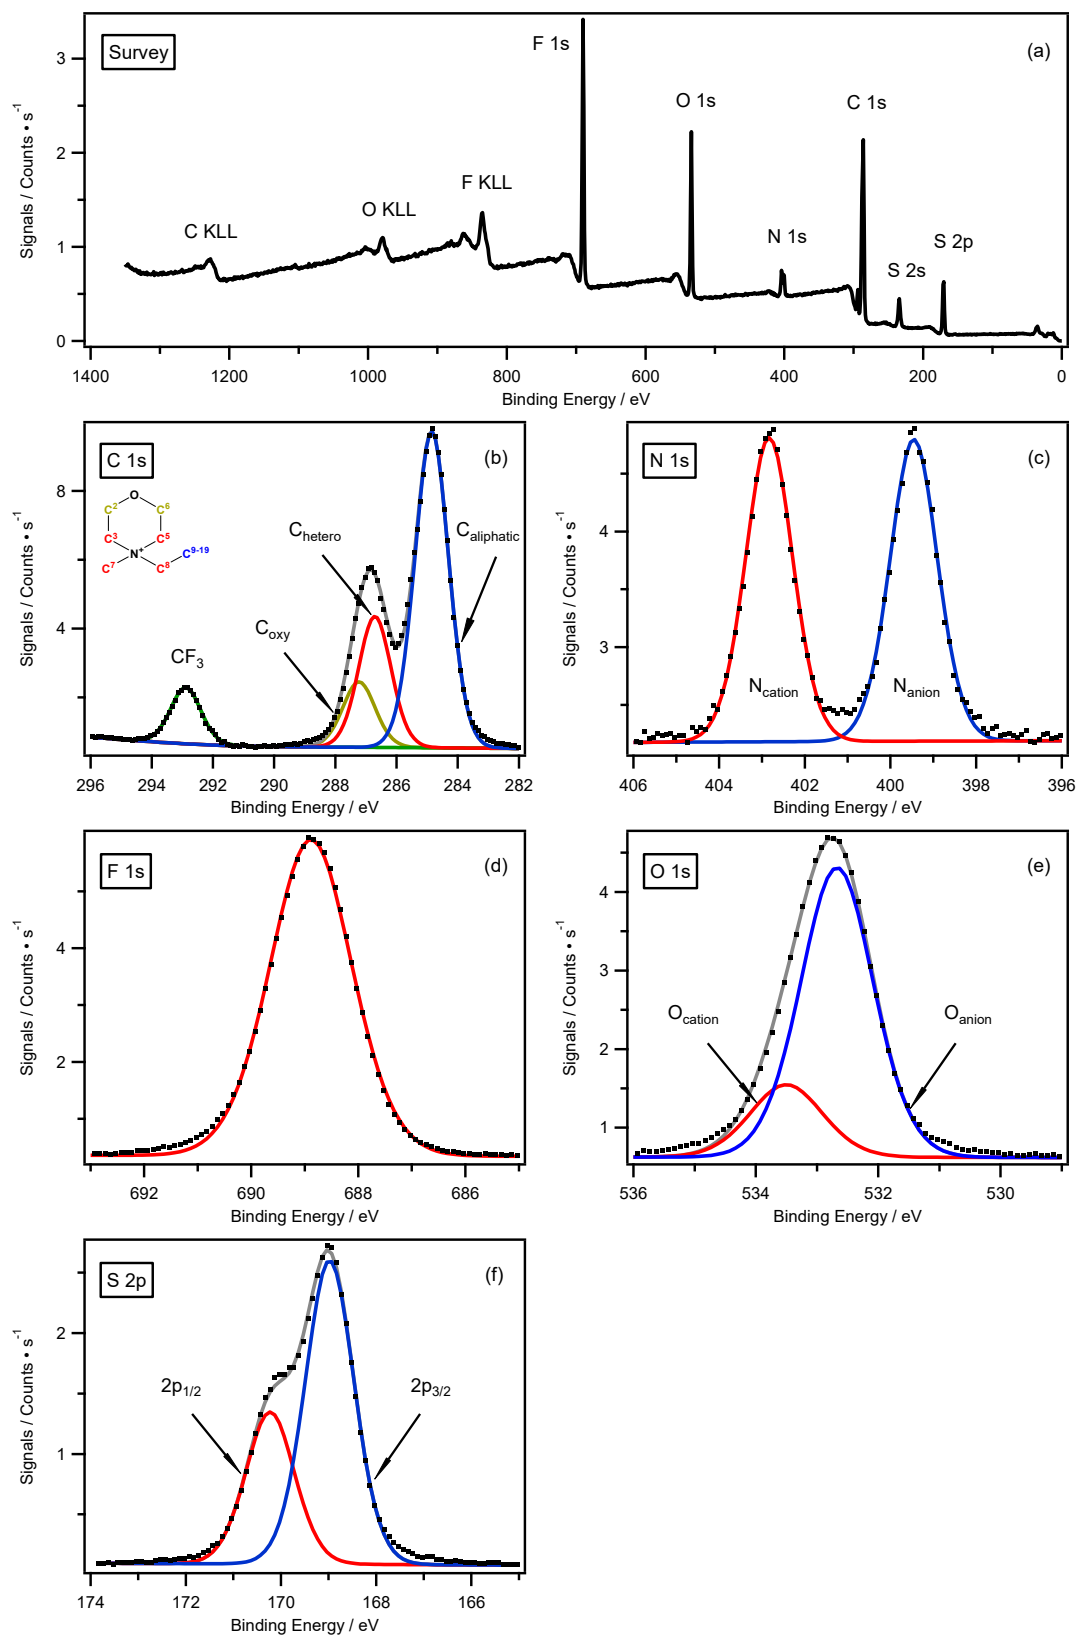

**Figure S4** XPS spectra of all elements for  $[C_{12}C_1Mor][Tf_2N]$ : (a) Survey, (b) C 1s, (c) N 1s, (d) F 1s, (e) O 1s and (f) S 2p.

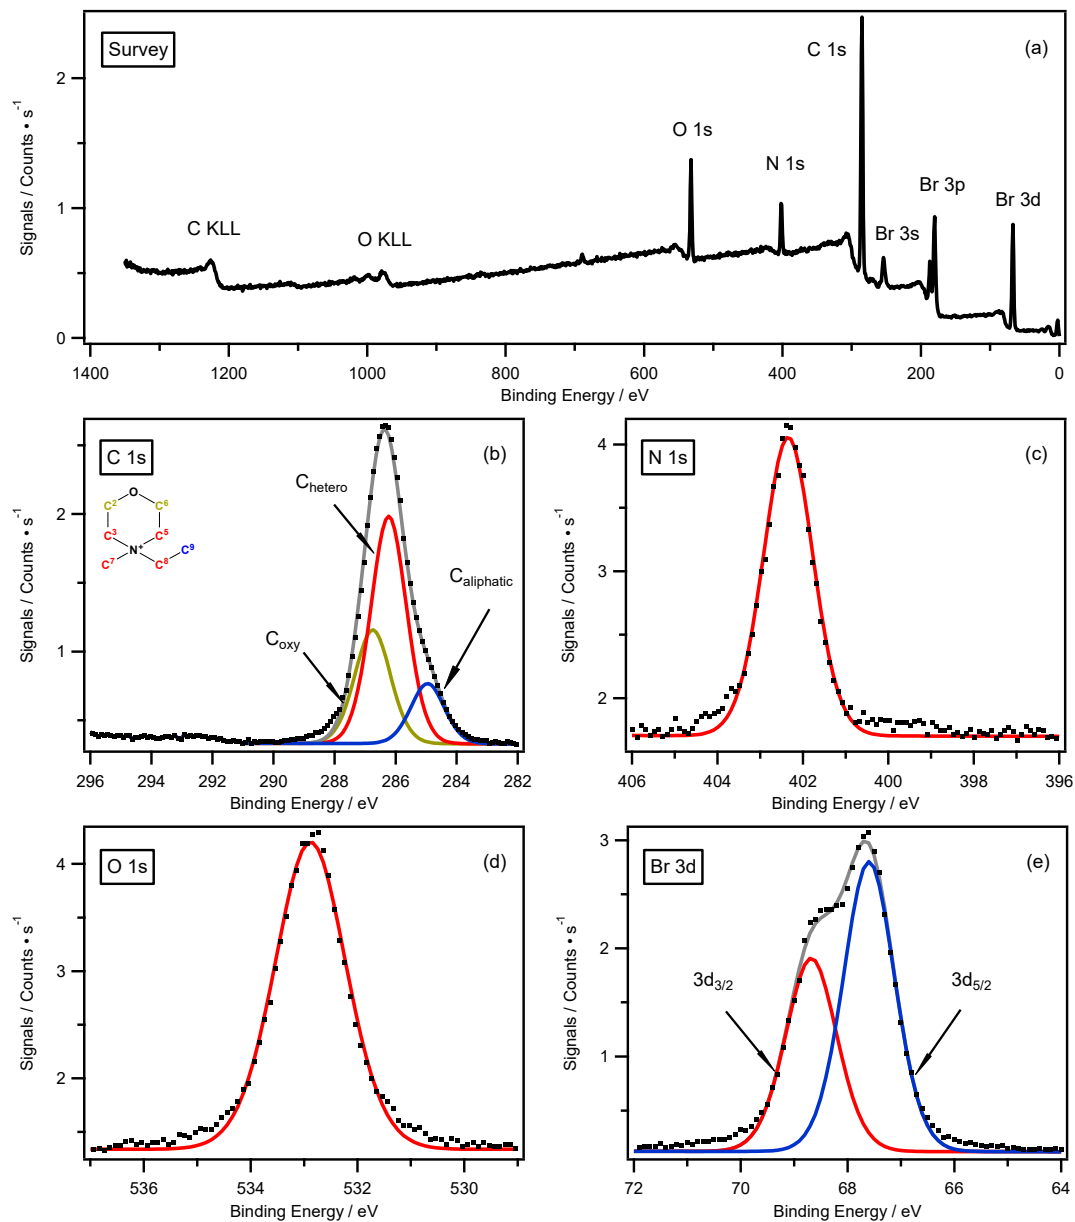

**Figure S5** XPS spectra of all elements for  $[C_2C_1Mor]Br$ : (a) Survey, (b) C 1s, (c) N 1s, (d) O 1s and (e) Br 3d.



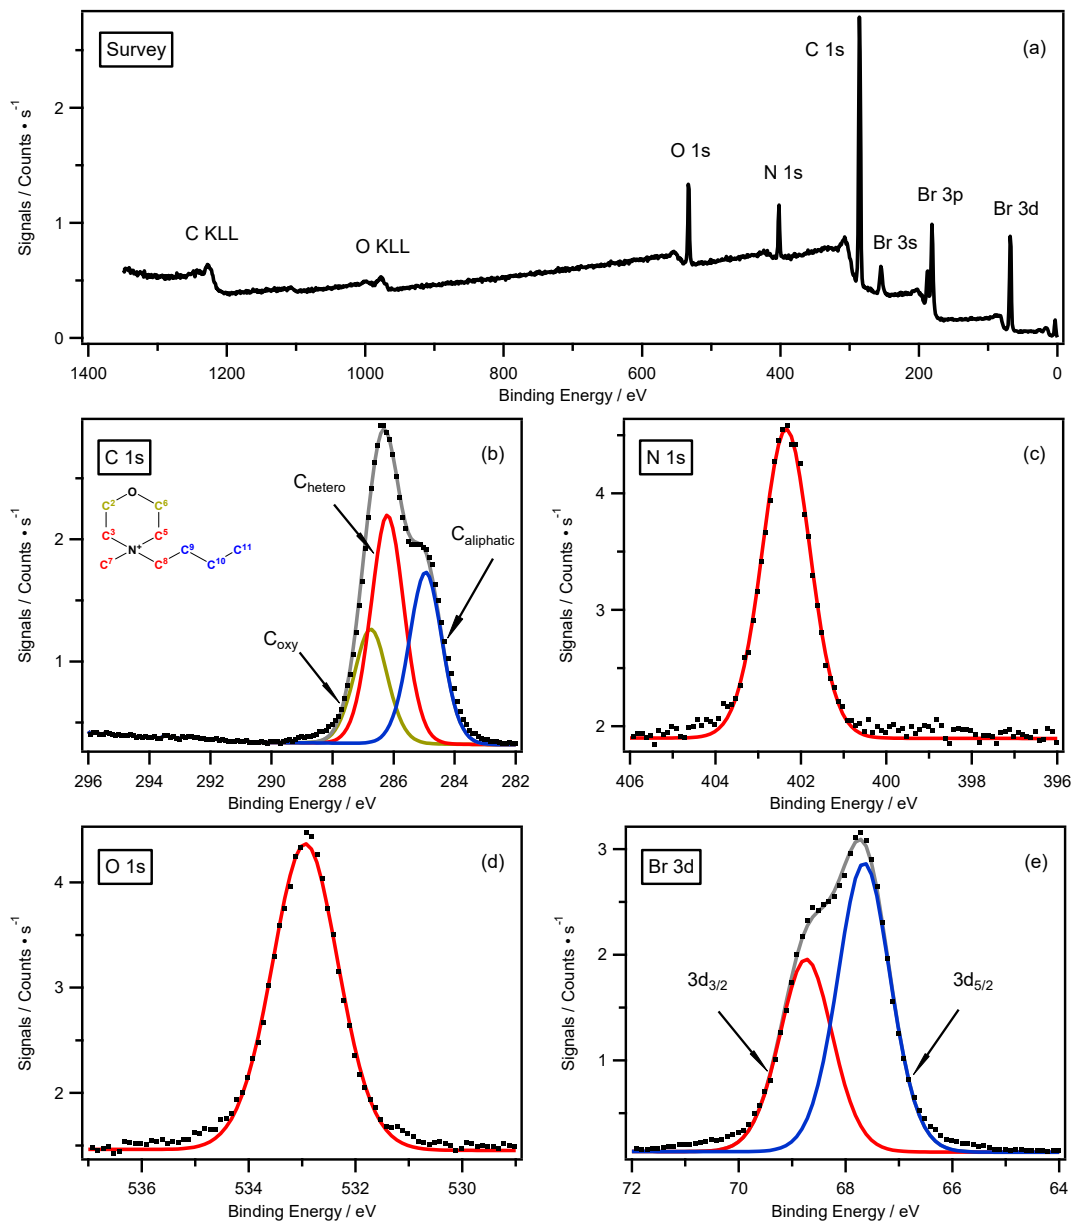

**Figure S6** XPS spectra of all elements for  $[C_4C_1Mor]Br$ : (a) Survey, (b) C 1s, (c) N 1s, (d) O 1s and (e) Br 3d.

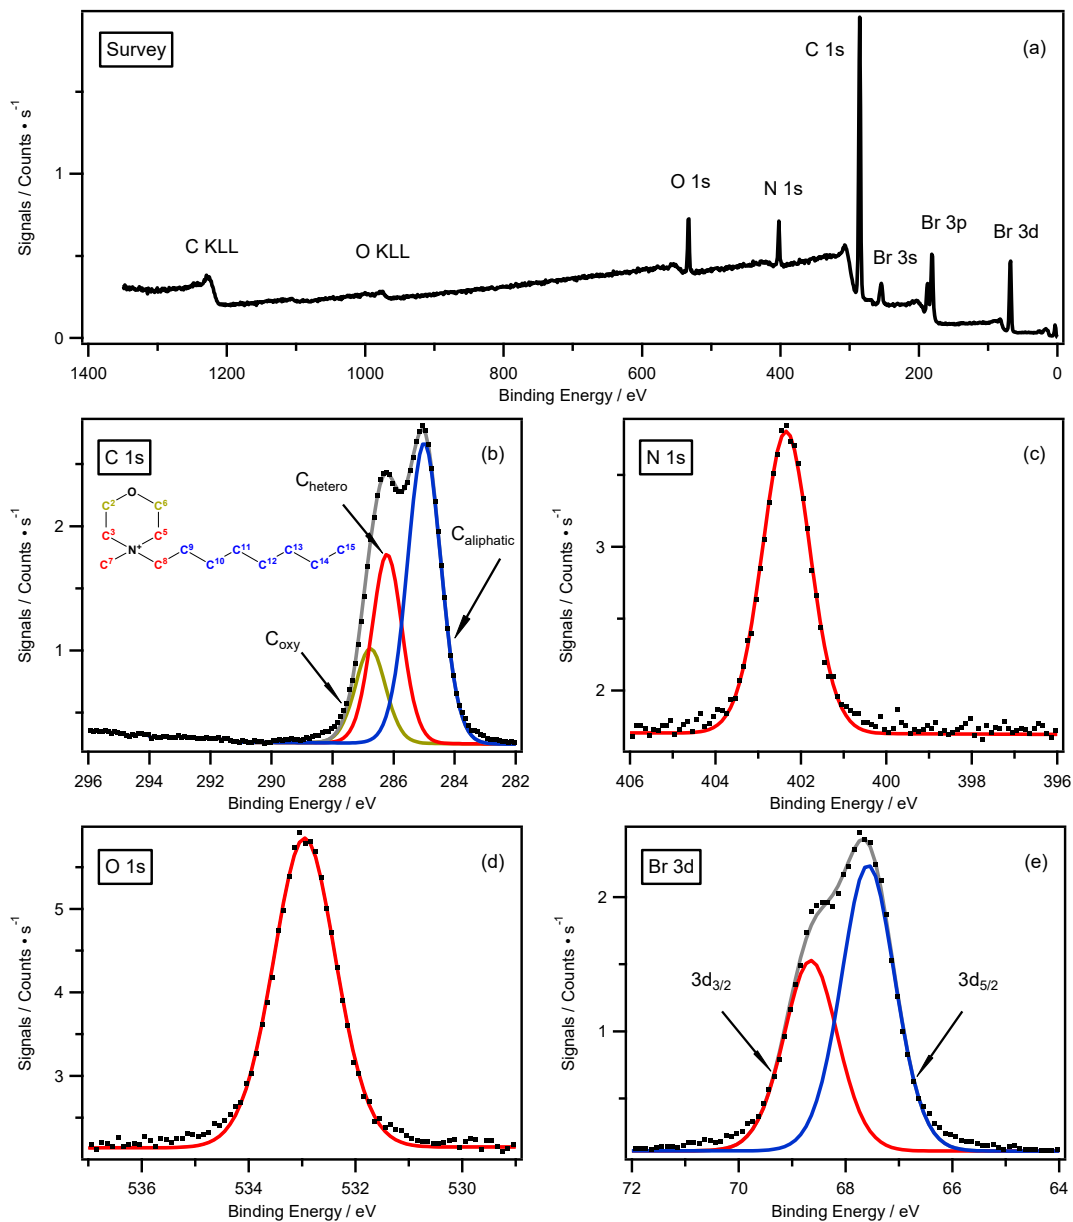

**Figure S7** XPS spectra of all elements for  $[C_8C_1Mor]Br$ : (a) Survey, (b) C 1s, (c) N 1s, (d) O 1s and (e) Br 3d.

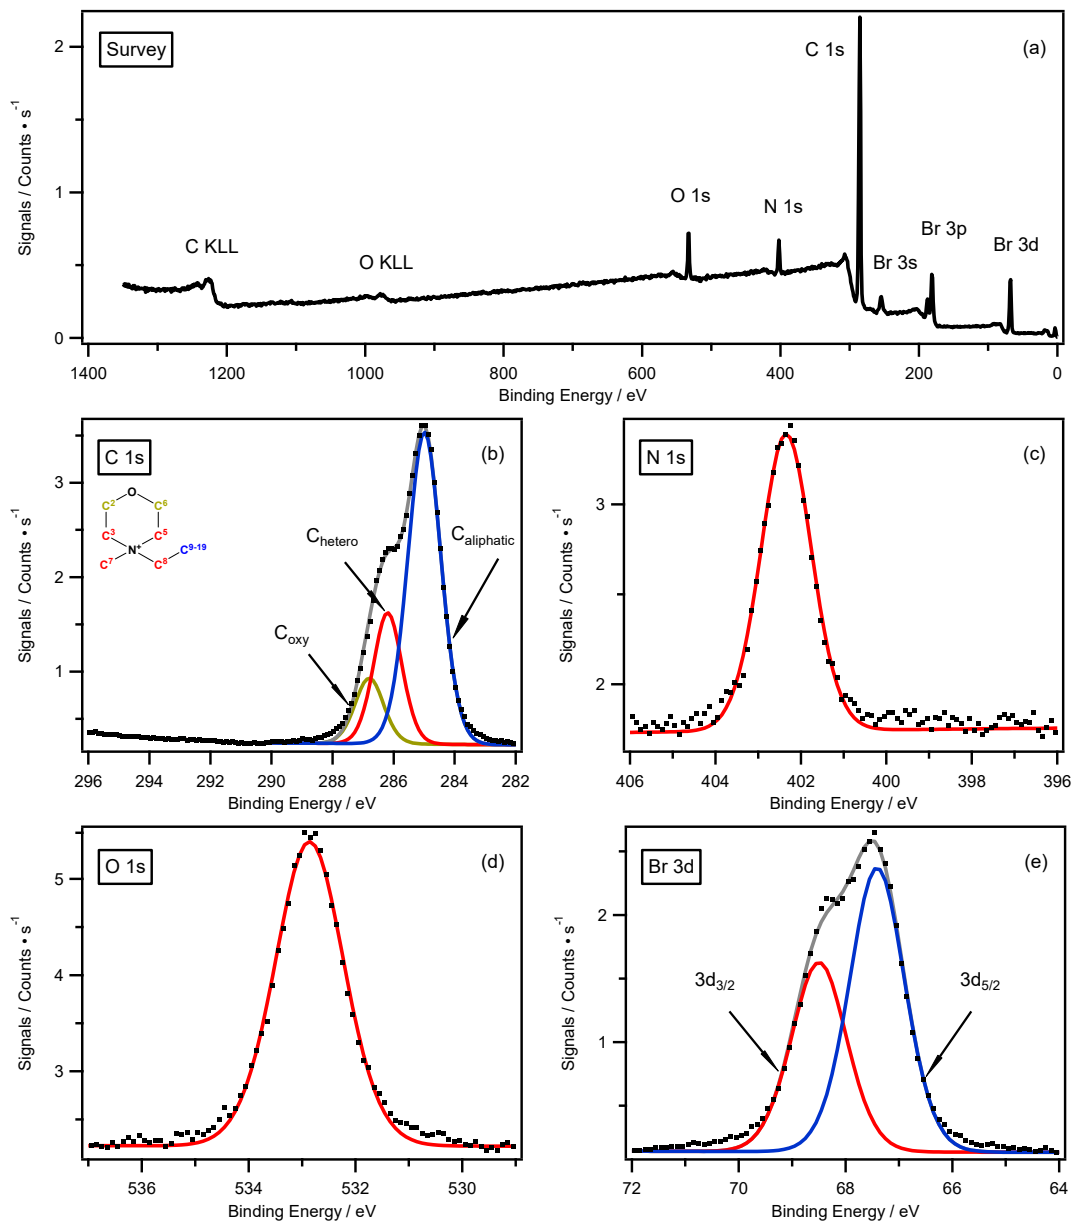

**Figure S8** XPS spectra of all elements for  $[C_{12}C_1Mor]Br$ : (a) Survey, (b) C 1s, (c) N 1s, (d) O 1s and (e) Br 3d.

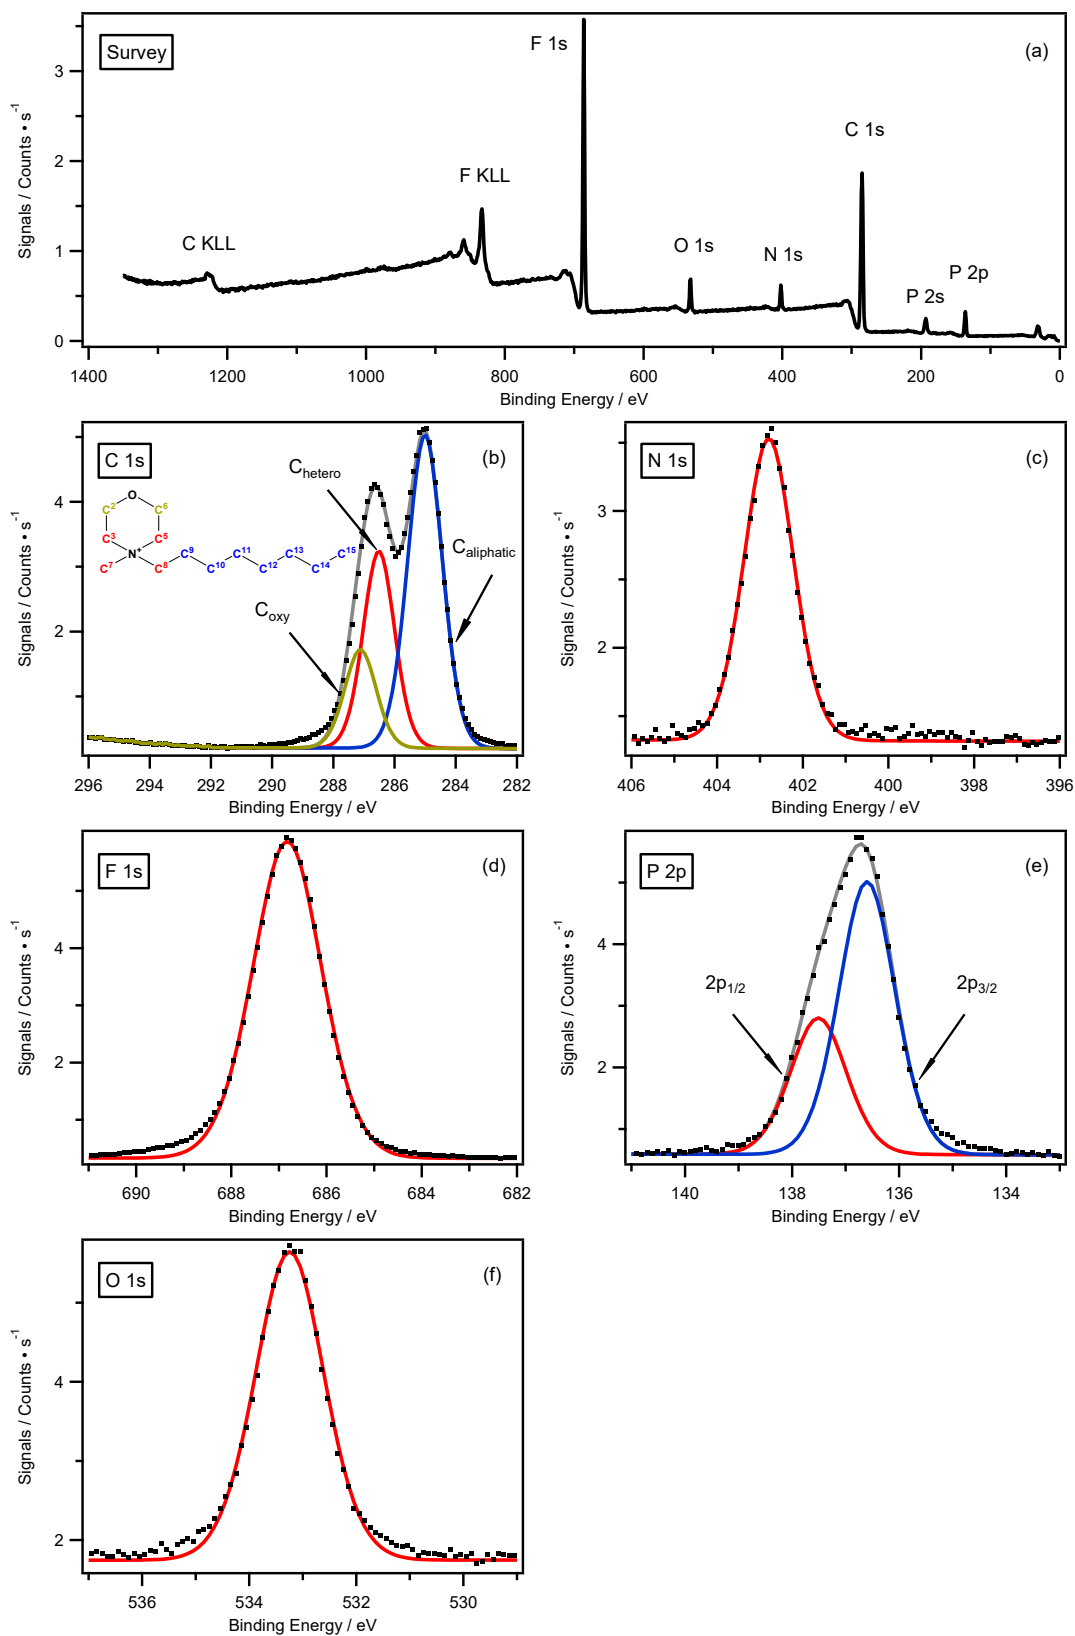

**Figure S9** XPS spectra of all elements for  $[C_8C_1Mor][PF_6]$ : (a) Survey, (b) C 1s, (c) N 1s, (d) F 1s, (e) P 2p and (f) O 1s.

### References

1. K. Lava, K. Binnemans and T. Cardinaels, *J. Phys. Chem. B*, 2009, **113**, 9506-9511.

2. J. H. Cha, K. S. Kim, S. Choi, S. H. Yeon, H. Lee, H. S. Kim and H. Kim, *Korean J. Chem. Eng.*, 2005, **22**, 945-948.
3. K. Yavir, L. Marcinkowski, A. Kloskowski and J. Namiesnik, *J. AOAC Int.*, 2017, **100**, 1660-1670.
4. S. Choi, K. S. Kim, J. H. Cha, H. Lee, J. S. Oh and B. B. Lee, *Korean J. Chem. Eng.*, 2006, **23**, 795-799.
